# Supplementary material for: Self-assembly of a water soluble perylene and surfactant into fluorescent supramolecular ensembles sensitive to acetylcholinesterase activity
Source: Royal Society of Chemistry journal article supplement (doi:10.1039/c6ra08869d), 2016-01-01
Supplement: c6ra08869d1.pdf [file c6ra08869d1.pdf]

*Electronic Supporting Information*

**Self-Assembly of a Water Soluble Perylene and Surfactant into Fluorescent Supramolecular Ensembles Sensitive to Acetylcholinesterase Activity**

*Giorgio Grisci, Erika Kozma, Wojciech Mróz, Katuscia Pagano, Laura Ragona\* and Francesco Galeotti\**

l.ragona@ismac.cnr.it

f.galeotti@ismac.cnr.it

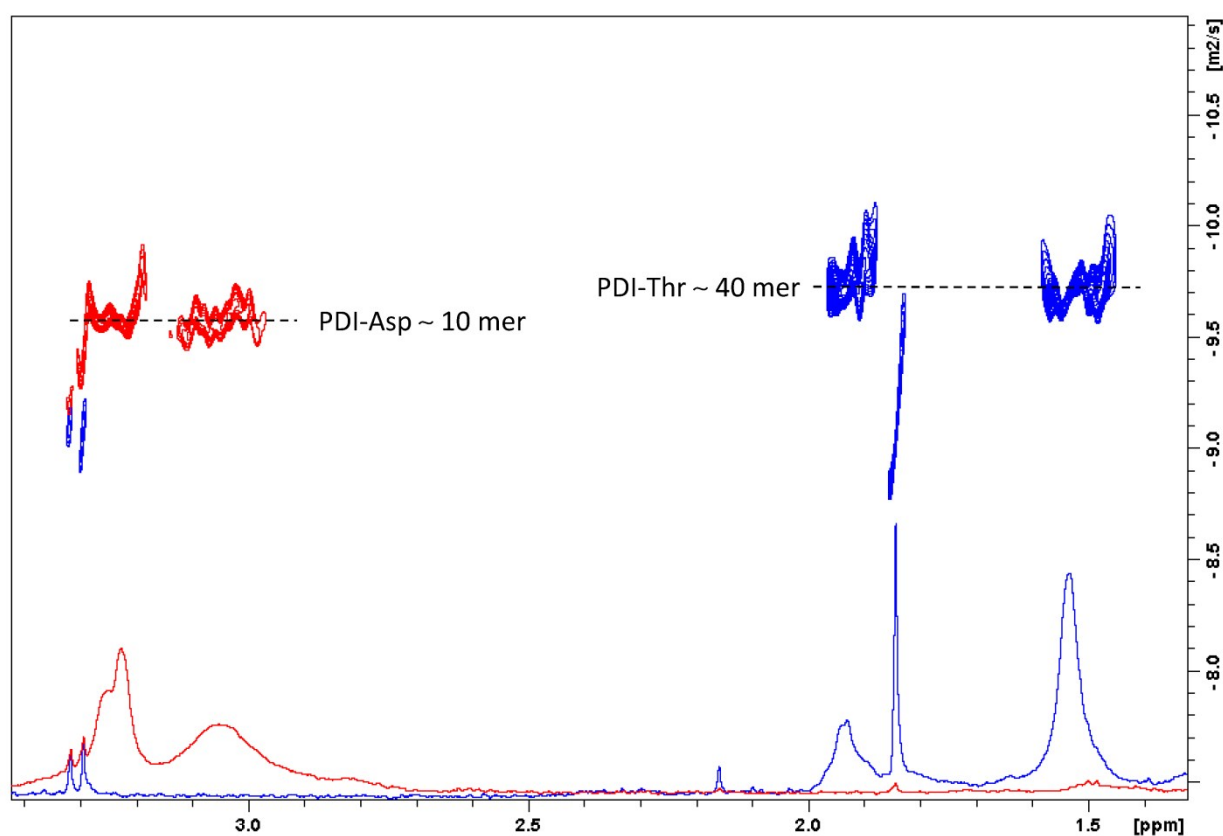

**Figure S1.** Overlay of a selected region of 2D DOSY spectra of 0.5 mM PDI-Thr (blue) and 0.5 mM PDI-Asp (red) recorded at 500 MHz at 25°C. <sup>1</sup>H 1D spectra of the two samples are reported with the same color code.

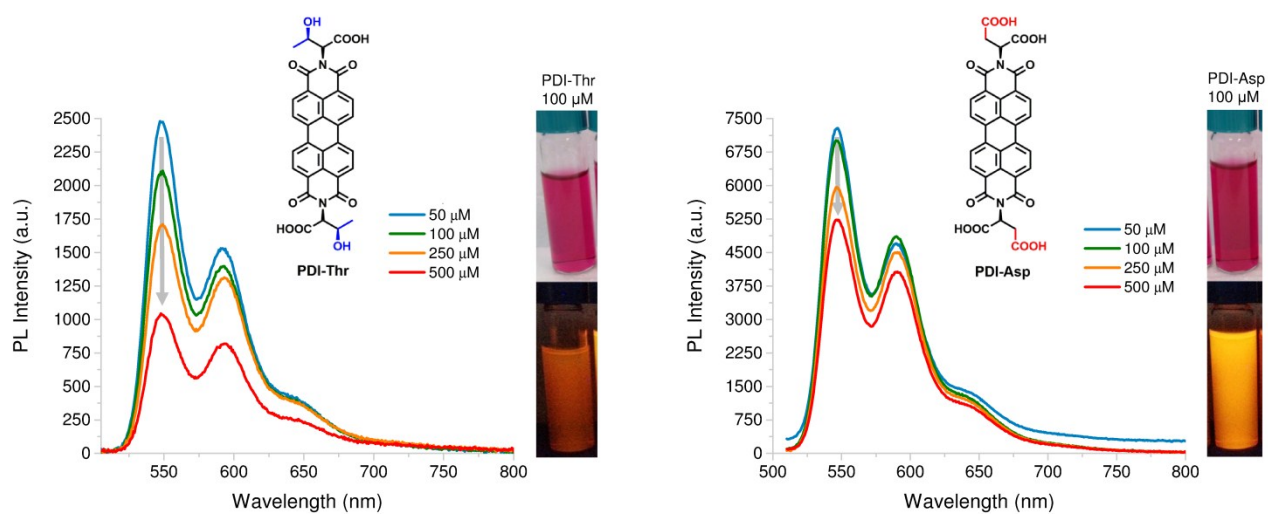

**Figure S2.** PL comparison between PDI-Thr and PDI-Asp aqueous solutions at pH 8. The grey arrows on PL spectra evidence the concentration-dependent quenching. For each compound, the digital photograph of a 100  $\mu$ M solution seen under ambient light (top) and under UV lamp ( $\lambda = 365$  nm, bottom) is also shown.

The visual comparison evidences that, at the same concentration, the fluorescence emission of PDI-Asp solutions are more intense than those of PDI-Thr, indicating a bigger aggregation tendency of the latter.

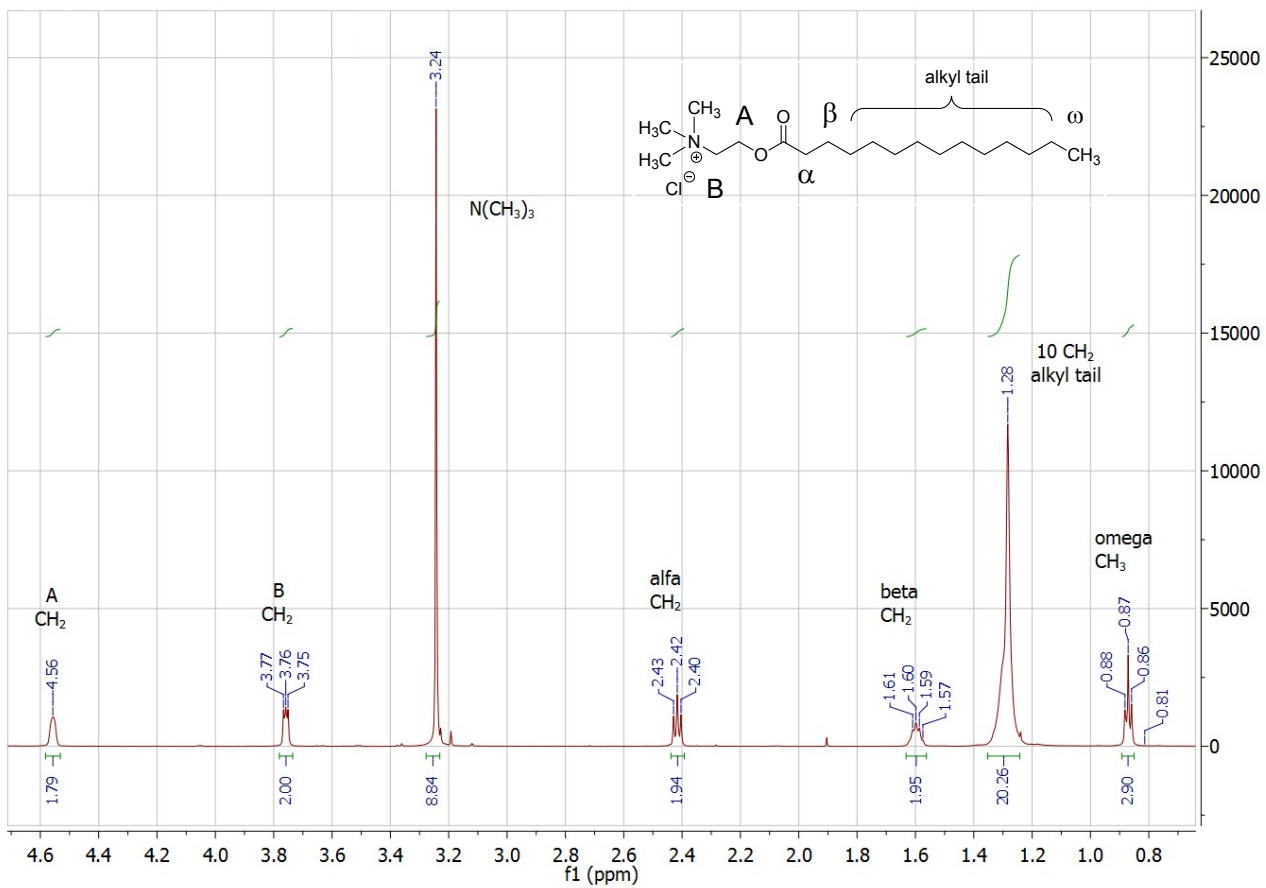

**Figure S3.**  $^1\text{H}$  NMR assignment of MyrCh 3.0 mM in  $\text{D}_2\text{O}$ .

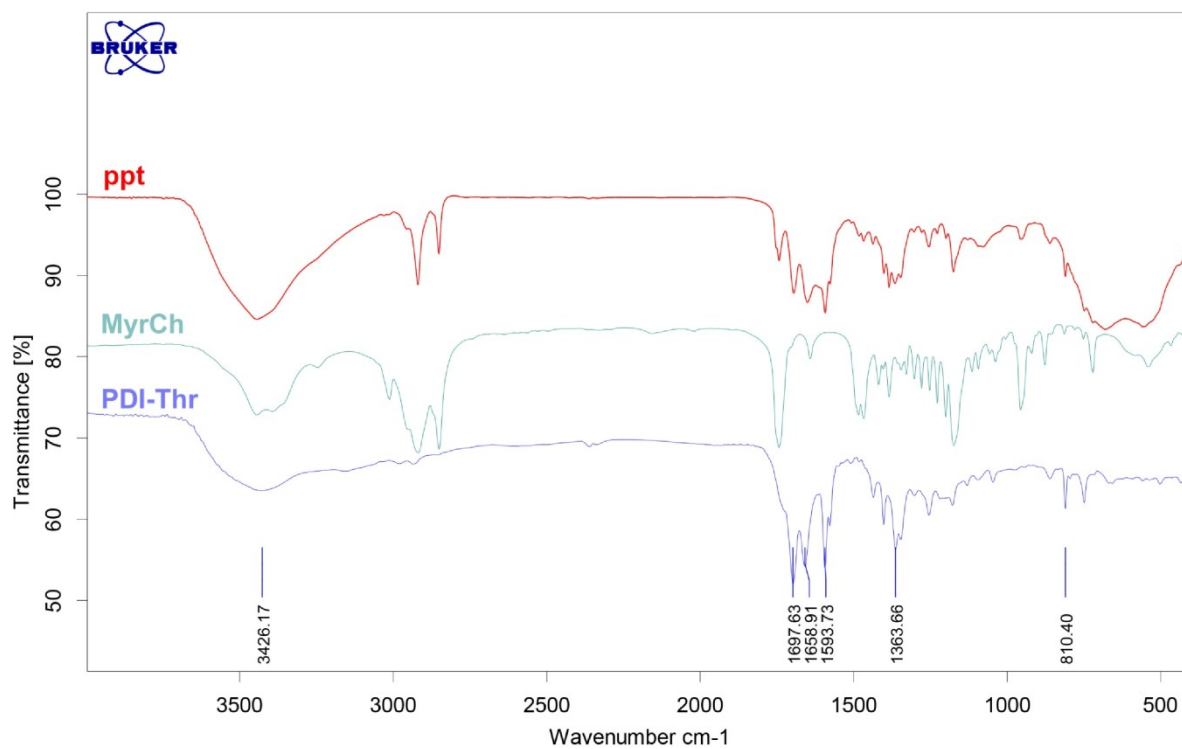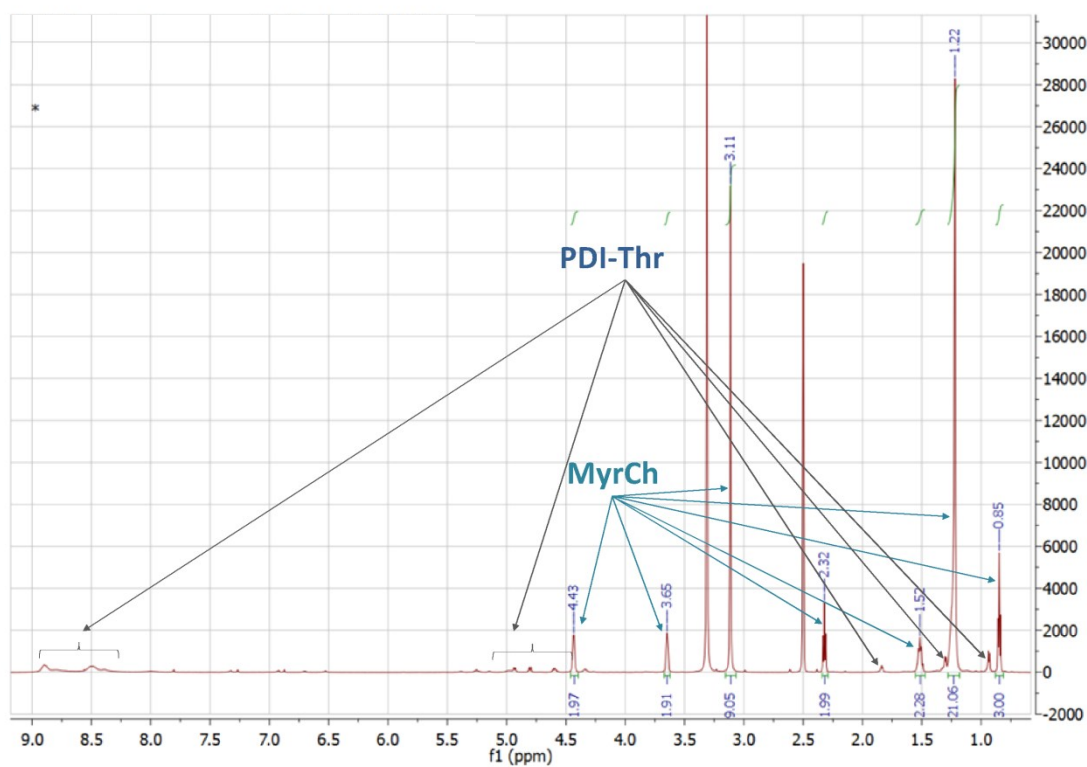

**Figure S4.** IR (top) and <sup>1</sup>H NMR (bottom) spectroscopy analysis of the insoluble hetero-aggregate (ppt) formed at dye/surfactant composition  $\approx$  1:2. For IR analysis, the ppt dry powders were dispersed in KBr pellets; for NMR analysis, they were dissolved in deuterated DMSO.

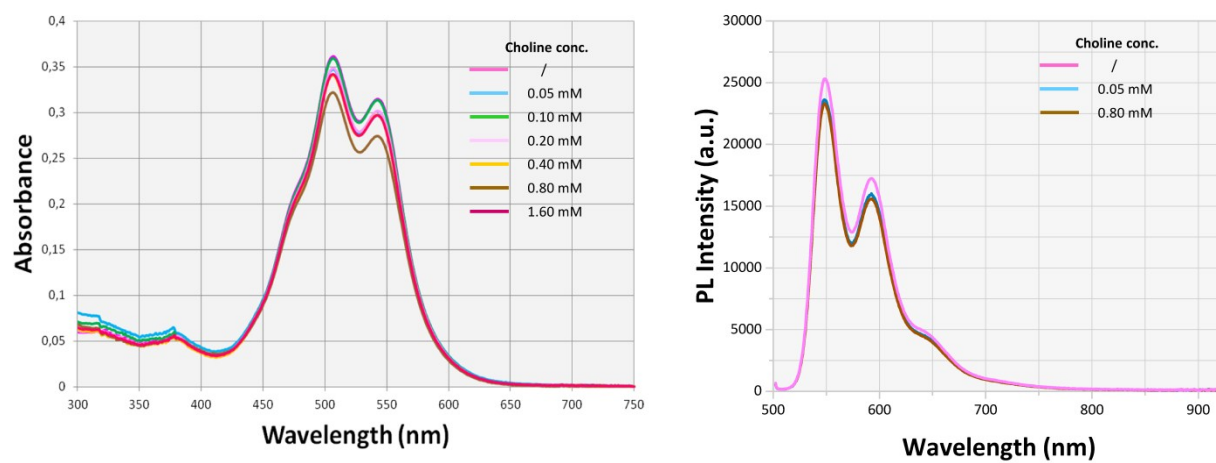

**Figure S5.** Concentration-dependent absorption (left) and emission (right) spectra of 0.1 mM PDI-Thr solutions (PB pH 8) in the presence of different choline amounts (0-1.60 mM).

Both plots evidence the absence of any surfactochromic effect due to choline.
